# Supplementary material for: Loneliness and Risk of Parkinson Disease
Source: PubMed Central journal article supplement (PMC10546293; doi:10.1001/jamaneurol.2023.3382), 2023-10-02
Supplement: jamaneurol-e233382-s002.pdf [file jamaneurol-e233382-s002.pdf]

## Data Sharing Statement

Terracciano. Loneliness and Risk of Parkinson Disease. *JAMA Neurol.* Published October 02, 2023. doi:10.1001/jamaneurol.2023.3382

### Data

**Data available:** Yes

**Data types:** Deidentified participant data, Data dictionary

**How to access data:** The UK Biobank data are available to researchers who apply with UK Biobank (<https://www.ukbiobank.ac.uk>). Key elements of the application are a research plan, a listing of requested variables, and a payment to the UK Biobank.

**When available:** With publication

### Supporting Documents

**Document types:** None

### Additional Information

**Who can access the data:** UK Biobank data are available to researchers who apply with UK Biobank (<https://www.ukbiobank.ac.uk>).

**Types of analyses:** UK Biobank data are available to researchers who apply with UK Biobank (<https://www.ukbiobank.ac.uk>).

**Mechanisms of data availability:** after approval of a proposal by UK Biobank
